# Supplementary material for: Experimental and Theoretical Studies of Dissociative Electron Attachment to Metabolites Oxaloacetic and Citric Acids
Source: MDPI journal article supplement (doi:10.3390/ijms22147676), 2021-07-18

## SUPPLEMENTARY INFORMATION

Figure S1: Optimized geometry of the trans-enol oxaloacetic acid

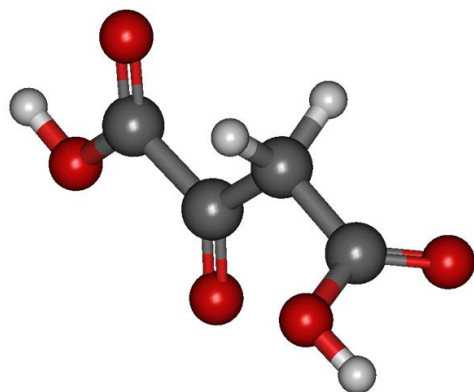

Figure S2: Calculated resonance energies (eV) and molecular orbitals associated with the attachment of the electron for the trans-enol oxaloacetic acid, calculated at the  $\omega$ B97x/cc-pvtz level of theory at 0 K.

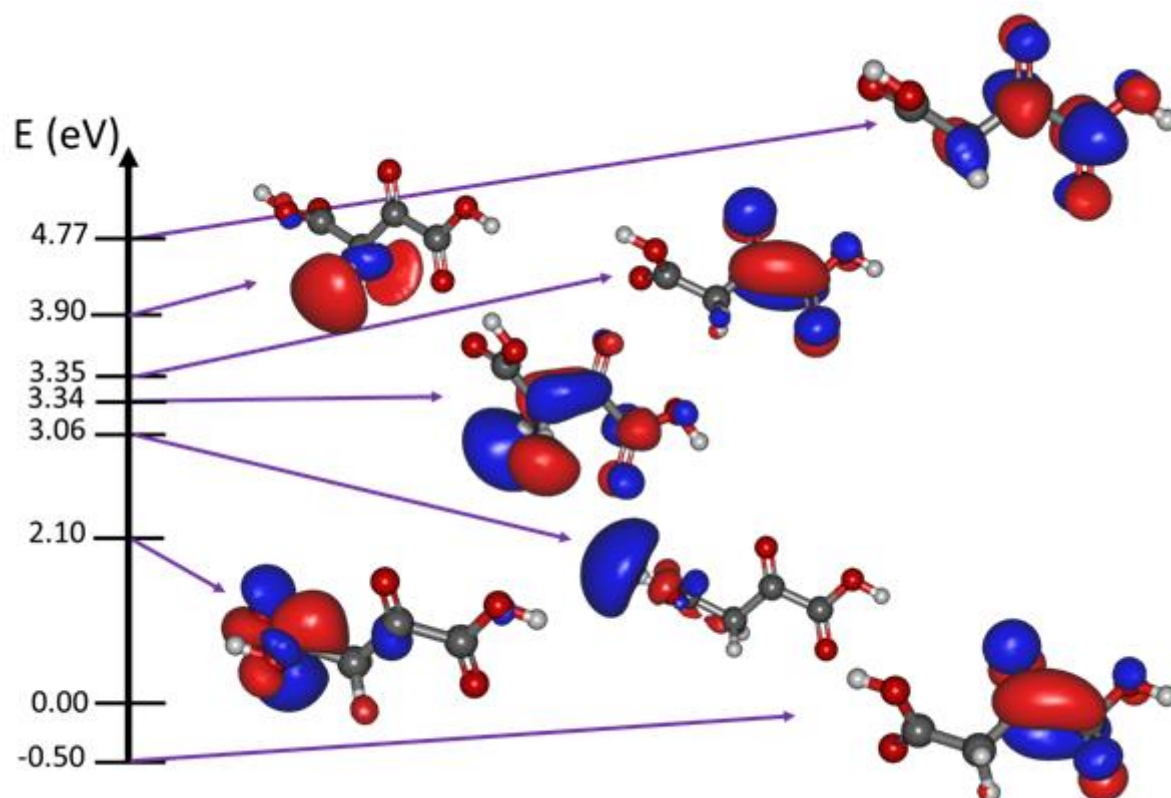

Supplement: s1 [file s1]
